# Supplementary material
Source: Royal Society of Chemistry journal article supplement (doi:10.1039/d6ta01055e)
Supplement: d6ta01055e1.pdf [file d6ta01055e1.pdf]

## Supporting Information

### Growth of Mixed-Valence 2D $\alpha$ -MnO<sub>x</sub> Nanosheets within Interlayer Spaces of Multilayer Ti<sub>3</sub>C<sub>2</sub> as an Efficient Air Cathode for Rechargeable Li-O<sub>2</sub> Batteries

Aqrab ul Ahmad<sup>†</sup>, William G Morais<sup>†</sup>, Tauqeer Ahmad, Ihsan Çaha, Isilda Amorim, Siva Sankar, Francis Leonard Deepak\*

International Iberian Nanotechnology Laboratory (INL), Avenida Mestre Jose Veiga, Braga 4715-330, Portugal

<sup>†</sup>authors contributed equally

\*email: [leonard.francis@inl.int](mailto:leonard.francis@inl.int)

## 1. Experimental Section

### 1.1. Materials and Methods

Reagents: manganese chloride (MnCl<sub>2</sub>·4H<sub>2</sub>O 99%), potassium borate, lithium fluoride powder (LiF), Ti<sub>3</sub>AlC<sub>2</sub> MAX phase, N, N-dimethylformamide (DMF 98%), ethanol, hydrochloric acid (HCl 30% diluted), LiTFSI (lithium bis(trifluoromethane)sulfonimide), TEGDME (tetraethylene glycol dimethyl ether) were purchased from Sigma Portugal. Super P carbon (C-ENERGY, Nanografi) and polyvinylidene fluoride (PVDF, Nanografi). All chemicals were analytical-grade reagents and used as received.

### 1.2. Synthesis of Ti<sub>3</sub>C<sub>2</sub>T<sub>x</sub> MXene.

Multilayer Ti<sub>3</sub>C<sub>2</sub>T<sub>x</sub> MXene was produced by selectively etching Ti<sub>3</sub>AlC<sub>2</sub> with a LiF/HCl solution. Typically, 1.0 g of LiF was dissolved in 20 mL of 9 M HCl, then 1.0 g of Ti<sub>3</sub>AlC<sub>2</sub> was gradually added while stirring. The mixture was kept at 35 °C for 24 hours to remove the Al layer and form Ti<sub>3</sub>C<sub>2</sub>T<sub>x</sub> with -O/-OH/-F terminations. The product was washed repeatedly by centrifugation until the supernatant reached a pH of approximately 6, resulting in multilayer MXene.

### 1.3. Delamination and In-situ growth of 2D $\alpha$ -MnO<sub>x</sub>

To produce delaminated Ti<sub>3</sub>C<sub>2</sub>T<sub>x</sub> and simultaneously induce 2D  $\alpha$ -MnO<sub>x</sub> formation, 200 mg of etched MXene was dispersed in 20 mL of dimethyl sulfoxide (DMSO) and stirred for 30 minutes. DMSO functions as an intercalation agent, weakening van der Waals forces between layers and facilitating ion penetration. Subsequently, 0.5 mmol of MnCl<sub>2</sub> · 4H<sub>2</sub>O was directly added to the MXene-DMSO mixture. Mn<sup>+2</sup> diffuses into the interlayers via the swollen galleries created by DMSO, forming confined nucleation sites. Shortly after, 10 mL of 1.0 M potassium borate solution was added. The borate ions (B(OH)<sub>4</sub><sup>-</sup>) create a mildly alkaline environment (pH ≈ 8-9) that promotes the partial oxidation of Mn<sup>+2</sup> to Mn<sup>+3</sup>/Mn<sup>+4</sup>, while also transiently coordinating with Mn to stabilize the edge-sharing MnO<sub>6</sub> octahedra typical of  $\alpha$ -MnO<sub>x</sub>. The entire reaction mixture was heated at 40 °C for 12 hours. This moderate temperature promotes interlayer diffusion and gradual redox conversion while preventing bulk MnO<sub>x</sub> precipitation. Confinement within MXene interlayers results in the formation of 2D  $\alpha$ -MnO<sub>x</sub> nanosheets. In this mild redox process, synergistic oxidation occurs due to (i) borate-buffered alkaline conditions, (ii) oxygen-containing MXene surface groups (-O and -OH), and (iii)

DMSO-limited oxidative ability at higher temperatures. Consequently,  $\text{Mn}^{2+}$  is slowly oxidized to a complex mixture of  $\text{Mn}^{4+}$ ,  $\text{Mn}^{3+}$ , and  $\text{Mn}^{2+}$ , with the confined  $\text{Ti}_3\text{C}_2\text{T}_x$  layers stabilizing this distribution. After 12 hours, the solid product was collected by centrifugation, washed with water and ethanol to remove unreacted  $\text{Mn}^{2+}$ /borate/DMSO, and then dried in a vacuum oven at  $60^\circ\text{C}$ . The resulting powder is labelled as 2D  $\alpha\text{-MnO}_x\text{@M-Ti}_3\text{C}_2$ .

To further verify the spatial distribution of  $\text{MnO}_x$  within the multilayered  $\text{Ti}_3\text{C}_2$  MXene structure, a cross-sectional lamella was prepared by FIB-SEM and analyzed by SEM-EDS line profiling (Fig. S1). The lamella, extracted perpendicular to the MXene basal planes, enables direct probing across the stacked layers. The corresponding EDS line profile reveals a clear and continuous Mn signal that spatially correlates with the Ti signal throughout the multilayer region, rather than being confined to the outer surface.

Importantly, the Mn intensity exhibits periodic fluctuations that follow the layered morphology of the  $\text{Ti}_3\text{C}_2$  scaffold, indicating that Mn-containing species are distributed within the interlayer galleries rather than forming isolated surface aggregates. The absence of a sharp Mn enrichment exclusively at the outer edges further rules out dominant surface decoration or particle segregation. Instead, the co-localization of Mn and Ti signals across the lamella thickness provides strong evidence that  $\text{MnO}_x$  is intercalated and confined within the MXene interlayers.

These results directly support the proposed in situ growth mechanism, where  $\text{Mn}^{2+}$  ions intercalate into the swollen MXene galleries during DMSO-assisted delamination and subsequently undergo confined oxidation to form 2D  $\text{MnO}_x$  nanosheets within the interlayer spaces. This nanoscale confinement explains the layered distribution observed in the EDS profile and corroborates the structural model proposed in the main manuscript.

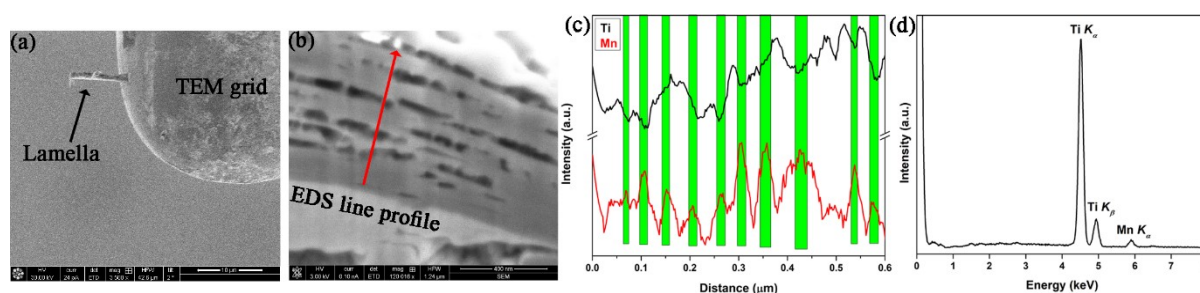

**Figure S1.** (a) SEM image of the MXene lamella on TEM grid. (b) SEM image with EDS line scan path (red arrow). (c) EDS line profile showing Ti (black) and Mn (red) distribution across the layers (green shaded regions). The correlated signals confirm  $\text{MnO}_x$  distribution within the interlayers. (d) EDS spectrum showing Ti and Mn peaks.

#### 1.4. Air cathode preparation and cell assembly

The electrodes were prepared by mixing the active material with Super P carbon (C-ENERGY, Nanografi) and polyvinylidene fluoride (PVDF, Nanografi) in a weight ratio of 70:20:10 using N-methyl-2-pyrrolidone (NMP, Merck) as the solvent to form a homogeneous slurry. The resulting slurry was uniformly coated onto carbon paper (microporous layer with PTFE, Quintech) and subsequently dried under vacuum at  $80^\circ\text{C}$  overnight. The dried electrodes were then punched into 12 mm diameter disks, with the mass of the active material (2D  $\alpha\text{-MnO}_x\text{@M-Ti}_3\text{C}_2$ ) controlled to achieve a loading of approximately  $1.4\text{ mg cm}^{-2}$ .

CR2032-type coin cells with meshed positive cases were assembled using the prepared air cathode and a lithium metal disk as the counter/reference electrode. A volume of  $150\ \mu\text{L}$  of 1 M LiTFSI

(lithium bis(trifluoromethane)sulfonimide) dissolved in TEGDME (tetraethylene glycol dimethyl ether) was used as the electrolyte, and a glass fiber separator (Whatman GF/F) was employed. All cell assembly procedures were carried out in an argon-filled glove box with H<sub>2</sub>O and O<sub>2</sub> levels maintained below 0.5 ppm.

### 1.5. Electrochemical Measurements

Electrochemical measurements were performed using a WBCS3000 battery test system (WonATech). Galvanostatic charge/discharge tests were conducted within a voltage window of 2.0 – 4.3 V (vs. Li/Li<sup>+</sup>) at current densities of 100, 200, and 500 mA g<sup>-1</sup> at room temperature. Cycling stability was evaluated under a fixed discharge capacity limit of 500 mAh g<sup>-1</sup>.

### 1.6. Structural Characterizations

Crystallographic features, including crystalline structure and phase identification, were examined using X-ray Diffraction (XRD) with a LabX XRD-6100 diffractometer. Morphological features were captured using a Zeiss Sigma 500 scanning electron microscope (SEM). Element distribution was analyzed in conjunction with energy-dispersive X-ray spectroscopy (EDS). Chemical vibrations were evaluated with a Horiba LabRAM HR Evolution confocal Raman spectrometer equipped with a 532 nm laser. Surface chemical states and elemental composition were analyzed by X-ray photoelectron

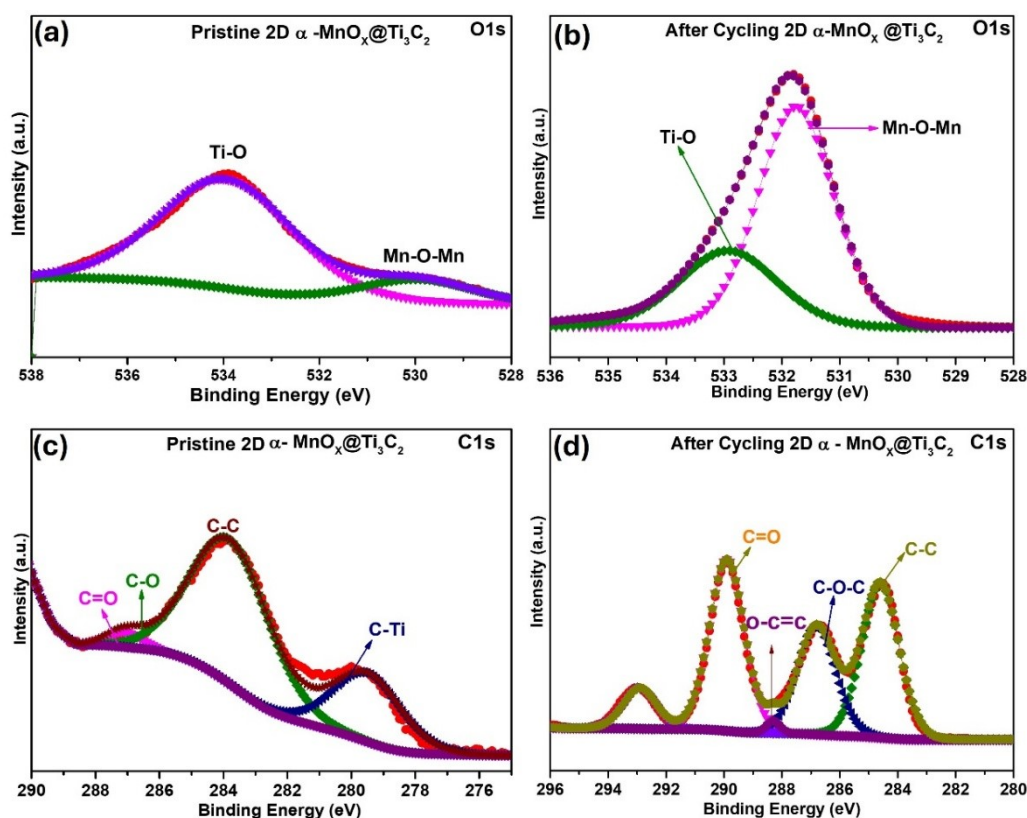

spectroscopy (XPS) using an ESCALAB Xi<sup>+</sup> system.

**Figure S2:** High-resolution XPS spectra of 2D  $\alpha$ -MnO<sub>x</sub>@M-Ti<sub>3</sub>C<sub>2</sub> before and after cycling in a Li-O<sub>2</sub> battery: (a) O1s spectrum of the pristine electrode, (b) O1s spectrum after cycling, (c) C1s spectrum

of the pristine electrode, and **(d)** C1s spectrum after cycling, showing changes in metal–oxygen bonding and the formation of oxygen-containing carbon species during electrochemical operation.

In the pristine state, the O 1s spectrum (**Fig S1 a**) exhibits characteristic peaks corresponding to Ti–O and Mn–O–Mn, confirming the successful integration of  $\alpha$ -MnO<sub>2</sub> with the M-Ti<sub>3</sub>C<sub>2</sub> MXene framework. After cycling (**Fig S1 b**), the increased intensity of the Mn–O–Mn component indicates enhanced involvement of Mn-based oxide species during the oxygen reduction and evolution reactions (ORR/OER), highlighting the catalytic role of  $\alpha$ -MnO<sub>x</sub> in facilitating Li-O<sub>2</sub> electrochemistry. The C1s spectra further elucidates interfacial changes occurring during battery operation. The pristine electrode (**Fig S1 c**) shows typical MXene-related bonding states, including C–C, C–O, C=O, and C–Ti, confirming the preserved carbide structure of M-Ti<sub>3</sub>C<sub>2</sub>. After cycling (**Fig S1 d**), new and intensified oxygenated carbon species such as C–O–C and O–C=O are observed, which are attributed to electrolyte decomposition and formation of discharge by-products. These changes indicate strong interfacial interactions between the electrode surface and reaction intermediates during repeated Li-O<sub>2</sub> cycling

**Figure S3.** EDS spectra collected from different regions of the  $\alpha$ -2D MnO<sub>x</sub>@M-Ti<sub>3</sub>C<sub>2</sub> electrode after 54 Li-O<sub>2</sub> battery cycles, showing the presence of C, Ti, Mn, and O with spatial variations in elemental intensities due to non-uniform discharge product deposition and electrolyte/binder decomposition.

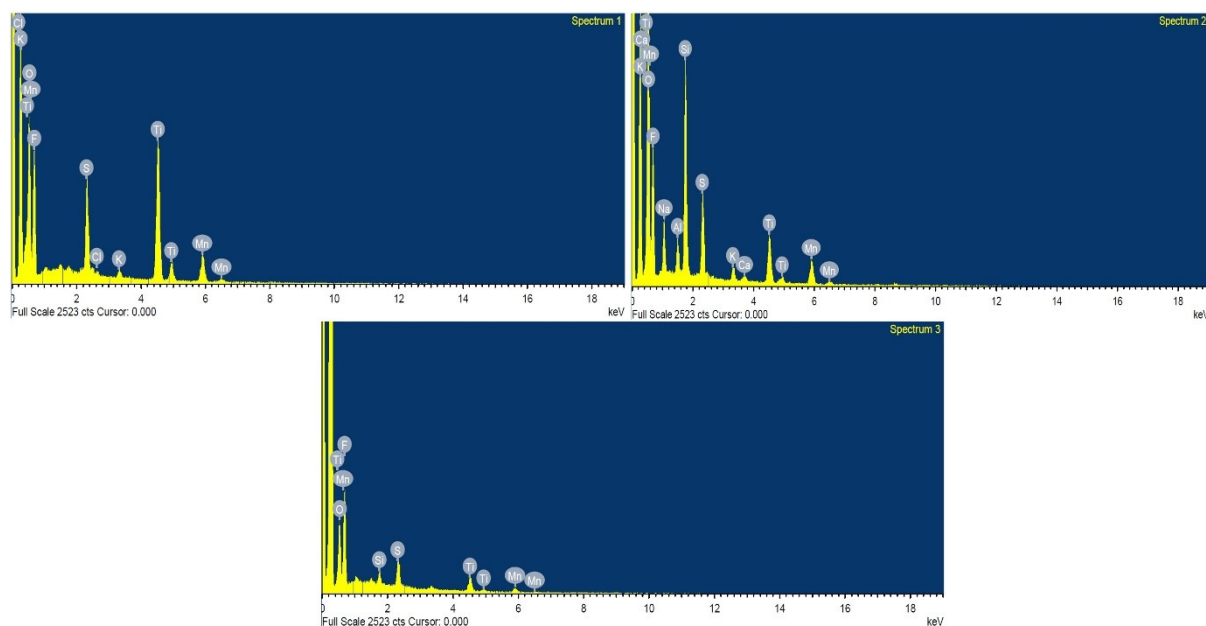

EDS spectra collected from different areas of the  $\alpha$ -2D  $\text{MnO}_x@M\text{-Ti}_3\text{C}_2$  electrode after 54 Li-O<sub>2</sub> battery cycles show consistent signals of C, Ti, Mn, and O, confirming the structural retention of the  $\text{MnO}_x$  catalyst anchored on the  $\text{Ti}_3\text{C}_2$  MXene framework. However, noticeable variations in peak intensities among the spectra indicate surface heterogeneity after prolonged cycling. Regions with stronger Ti and Mn signals suggest well-exposed and electrically connected  $\text{MnO}_x$  active sites, while areas with higher O and C intensities and detectable F- and S-containing species point to the accumulation of discharge products and electrolyte/binder decomposition residues. These results imply non-uniform deposition of Li-O<sub>2</sub> reaction products, leading to partial surface passivation in some regions, which is consistent with the gradual performance degradation observed during extended cycling.

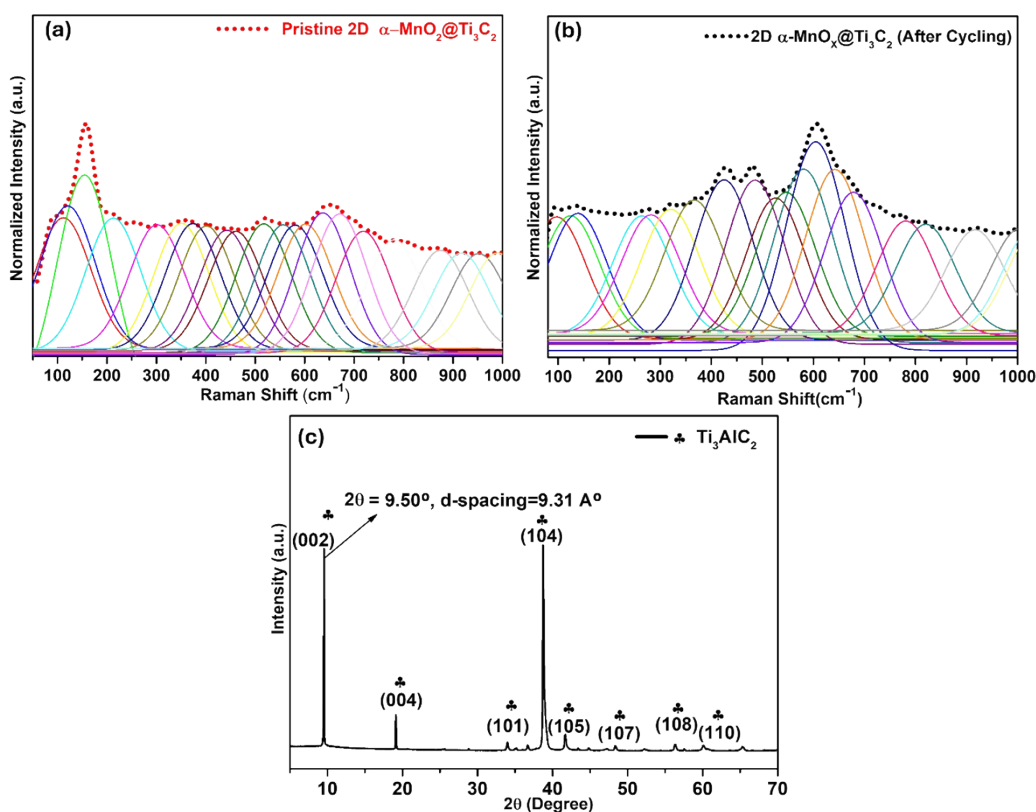

**Figure S4.** (a-b) Peak deconvolution analysis of the Raman spectra before and after cycling of 2D  $\alpha$ - $\text{MnO}_x@$  $\text{Ti}_3\text{C}_2$  and (c) X-ray diffraction (XRD) patterns of

MAX Phase.

**Table S1.** Summary and comparison of Li-O<sub>2</sub> battery performance with  $\text{MnO}_2$ -based electrocatalysts. \*mA g<sup>-1</sup>

| Catalyst | Maximum Capacity | Rate performance | Cycling performance | Ref |
|----------|------------------|------------------|---------------------|-----|
|          |                  |                  |                     |     |

|                                                                 | Capacity<br>(mA h g <sup>-1</sup> ) | Current<br>(mA cm <sup>-2</sup> ) | Capacity<br>(mA h g <sup>-1</sup> ) | Current<br>(mA cm <sup>-2</sup> ) | cycle<br>s | Current<br>(mA cm <sup>-2</sup> ) | Capacity<br>(mA h g <sup>-1</sup> ) |                  |
|-----------------------------------------------------------------|-------------------------------------|-----------------------------------|-------------------------------------|-----------------------------------|------------|-----------------------------------|-------------------------------------|------------------|
| $\alpha$ -MnO <sub>2</sub> /N-GNF                               | 4706                                | 0.1                               | 3260                                | 0.2                               | 50         | -                                 | 500                                 | 1                |
| Porous $\epsilon$ -MnO <sub>2</sub>                             | 5700                                | 100*                              | 3400                                | 800                               | 190        | 500                               | 800                                 | 2                |
| $\alpha$ -MnO <sub>2</sub> /CRT                                 | 4675                                | 400*                              | -                                   | -                                 | 303        | 800                               | 1000                                | 3                |
| 3D $\alpha$ -MnO <sub>2</sub>                                   | 8583                                | 100*                              | 6311                                | 300                               | 170        | 200                               | 1000                                | 4                |
| $\gamma$ -MnO <sub>2</sub> /G                                   | 11235                               | 75*                               | 6023                                | 300                               | 30         | 215                               | 1500                                | 5                |
| $\alpha$ -MnO <sub>2</sub> /GN                                  | 2500                                | 50*                               | 1632                                | 300                               | 47         | 100                               | 1000                                | 6                |
| $\alpha$ -MnO <sub>2</sub> /Co <sub>3</sub> O <sub>4</sub>      | 4850                                | 100*                              | 3401                                | 618                               | 50         | 103                               | 1030                                | 7                |
| 3D-G/ $\delta$ -MnO <sub>2</sub>                                | 3660                                | 48*                               | 770                                 | 387                               | 132        | 193                               | 1000                                | 8                |
| $\alpha$ -MnO <sub>2</sub>                                      | 6225                                | 0.1                               | -                                   | -                                 | 35         | -                                 | 800                                 | 9                |
| $\alpha$ -MnO <sub>2</sub> /C                                   | 1400                                | 100                               | -                                   | -                                 | 40         | 100                               | 500                                 | 10               |
| $\alpha$ -MnO <sub>2</sub> nanowires                            | 3000                                | 500                               | -                                   | -                                 | 10         | -                                 | 408                                 | 11               |
| MnO <sub>2</sub> -CNTs hybrid                                   | 2247                                | -                                 | 2250                                | 0.025                             | 6          | -                                 | 557                                 | 12               |
| carbon supported-MnO <sub>2</sub> hybrid                        | 4750                                | -                                 | -                                   | -                                 | 50         | -                                 | 3450                                | 13               |
| MnO <sub>2</sub> nanotubes                                      | -                                   | -                                 | -                                   | -                                 | 30         | -                                 | 250                                 | 14               |
| <b>2D- <math>\alpha</math>-MnOx@Ti<sub>3</sub>C<sub>2</sub></b> | <b>14,377</b>                       | <b>100*</b>                       | <b>11,242</b>                       | <b>300</b>                        | <b>54</b>  | <b>500</b>                        | <b>500</b>                          | <b>This work</b> |

Table S2: Comparison pure Mn<sup>3+</sup>, pure Mn<sup>4+</sup> and mixed valence catalytic activity.

| Catalyst | ORR onset | OER onset | $\Delta E$ (ORR–OER, V) | Reference |
|----------|-----------|-----------|-------------------------|-----------|
|----------|-----------|-----------|-------------------------|-----------|

|                                                    |                                       |                                       |              |                                                                                                                                                                                                                                              |
|----------------------------------------------------|---------------------------------------|---------------------------------------|--------------|----------------------------------------------------------------------------------------------------------------------------------------------------------------------------------------------------------------------------------------------|
| $\alpha$ -Mn <sub>2</sub> O <sub>2</sub> (pure 3+) | 0.82 (V vs. RHE)                      | 2.2 (V vs. RHE)                       | 1.38         | <a href="#">Single-Atom Ni Anchored on <math>\alpha</math>-MnO<sub>2</sub> Nanorods as an Electrocatalyst for the Oxygen Evolution and Oxygen Reduction Reactions   ACS Applied Nano Materials</a>                                           |
| $\alpha$ -Mn <sub>2</sub> O <sub>3</sub> (pure 4+) | 0.40 (V vs. RHE)                      | 2.39 (V vs. RHE)                      | 1.99         | <a href="https://doi.org/10.1039/C6DT03158G">https://doi.org/10.1039/C6DT03158G</a><br><br>and<br><br><a href="#">Manganese dissolution in alkaline medium with and without concurrent oxygen evolution in LiMn<sub>2</sub>O<sub>4</sub></a> |
| <b>Mixed Mn<sup>3+</sup>/Mn<sup>4+</sup></b>       | <b>2.75 (V vs. Li/Li<sup>+</sup>)</b> | <b>3.60 (V vs. Li/Li<sup>+</sup>)</b> | <b>0.85*</b> | <b>This work</b>                                                                                                                                                                                                                             |

\* at 100 mA g<sup>-1</sup>.

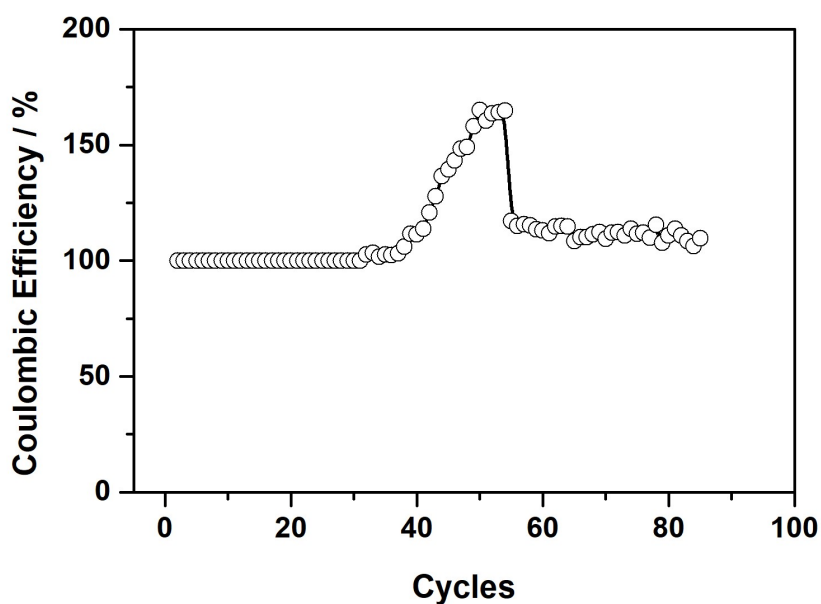

**Figure S5.** Coulombic efficiency of the LAB cell cycled at  $500 \text{ mA g}^{-1}$  with discharge limit of  $500 \text{ mAh g}^{-1}$ .

#### References:

- 1 A. Zahoor, M. Christy, H. Jang, K. S. Nahm and Y. S. Lee, *Electrochim. Acta*, 2015, **157**, 299–306.
- 2 X. Hu, F. Cheng, X. Han, T. Zhang and J. Chen, *Small*, 2015, **11**, 809–813.
- 3 F. Tu, Q. Wang, J. Xie, G. Cao, S. Zhang, J. Wang, S. X. Mao, X. Zhao and H. Y. Yang, *Energy Storage Mater.*, 2017, **6**, 164–170.
- 4 R. Bi, G. Liu, C. Zeng, X. Wang, L. Zhang and S. Z. Qiao, *Small*, 2019, **15**, 1–7.
- 5 Y. Yang, M. Shi, Y.-S. Li and Z.-W. Fu, *J. Electrochem. Soc.*, 2012, **159**, A1917–A1921.
- 6 Y. Cao, M. Sen Zheng, S. Cai, X. Lin, C. Yang, W. Hu and Q. F. Dong, *J. Mater. Chem. A*, 2014, **2**, 18736–18741.
- 7 P. Zhang, S. Zhang, M. He, J. Lang, A. Ren, S. Xu and X. Yan, *Adv. Sci.*, DOI:10.1002/advs.201700172.
- 8 S. Liu, Y. Zhu, J. Xie, Y. Huo, H. Y. Yang, T. Zhu, G. Cao, X. Zhao and S. Zhang, *Adv. Energy Mater.*, 2014, **4**, 1–9.
- 9 A. Zahoor, H. S. Jang, J. S. Jeong, M. Christy, Y. J. Hwang and K. S. Nahm, *RSC Adv.*, 2014, **4**, 8973–8977.
- 10 Y. Qin, J. Lu, P. Du, Z. Chen, Y. Ren, T. Wu, J. T. Miller, J. Wen, D. J. Miller, Z. Zhang and K. Amine, *Energy Environ. Sci.*, 2013, **6**, 519–531.
- 11 A. Débart, A. J. Paterson, J. Bao and P. G. Bruce, *Angew. Chemie - Int. Ed.*, 2008, **47**, 4521–4524.

- 12 J. Li, N. Wang, Y. Zhao, Y. Ding and L. Guan, *Electrochem. commun.*, 2011, **13**, 698–700.
- 13 H. Cheng and K. Scott, *J. Power Sources*, 2010, **195**, 1370–1374.
- 14 T. T. Truong, Y. Liu, Y. Ren, L. Trahey and Y. Sun, *ACS Nano*, 2012, **6**, 8067–8077.
